# Supplementary material for: Transcriptional upregulation of c-MET is associated with invasion and tumor budding in colorectal cancer
Source: PubMed Central journal article supplement (PMC5346688; doi:10.18632/oncotarget.12933), 2016-10-26
Supplement: oncotarget-07-78932-s001.pdf [file oncotarget-07-78932-s001.pdf]

## Transcriptional upregulation of c-MET is associated with invasion and tumour budding in colorectal cancer

### Supplementary Materials

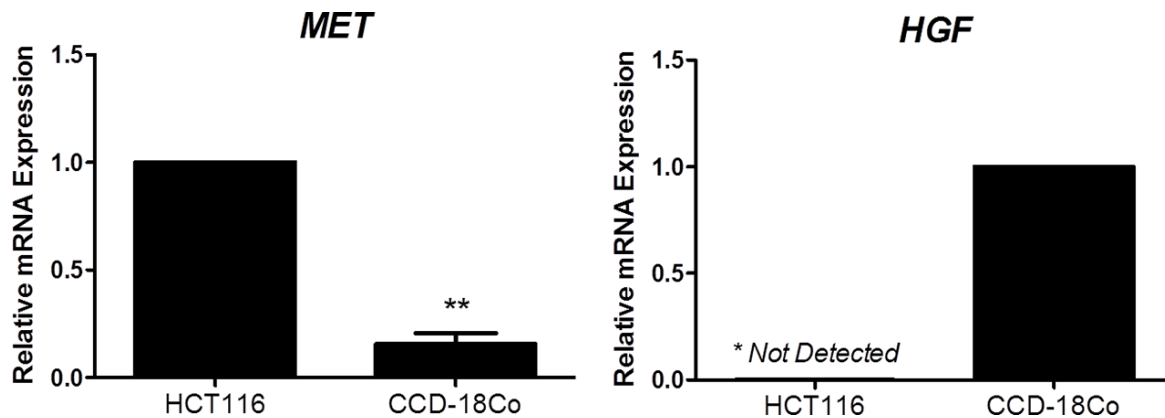

**Supplementary Figure S1: *MET* and *HGF* mRNA levels in HCT116 CRC cells and CCD-18Co colon fibroblast cells.** Q-PCR analysis of *MET* and *HGF* mRNA levels. Relative mRNA expression was calculated using the DDCT method with normalisation to GAPDH. \*\* =  $p < 0.01$

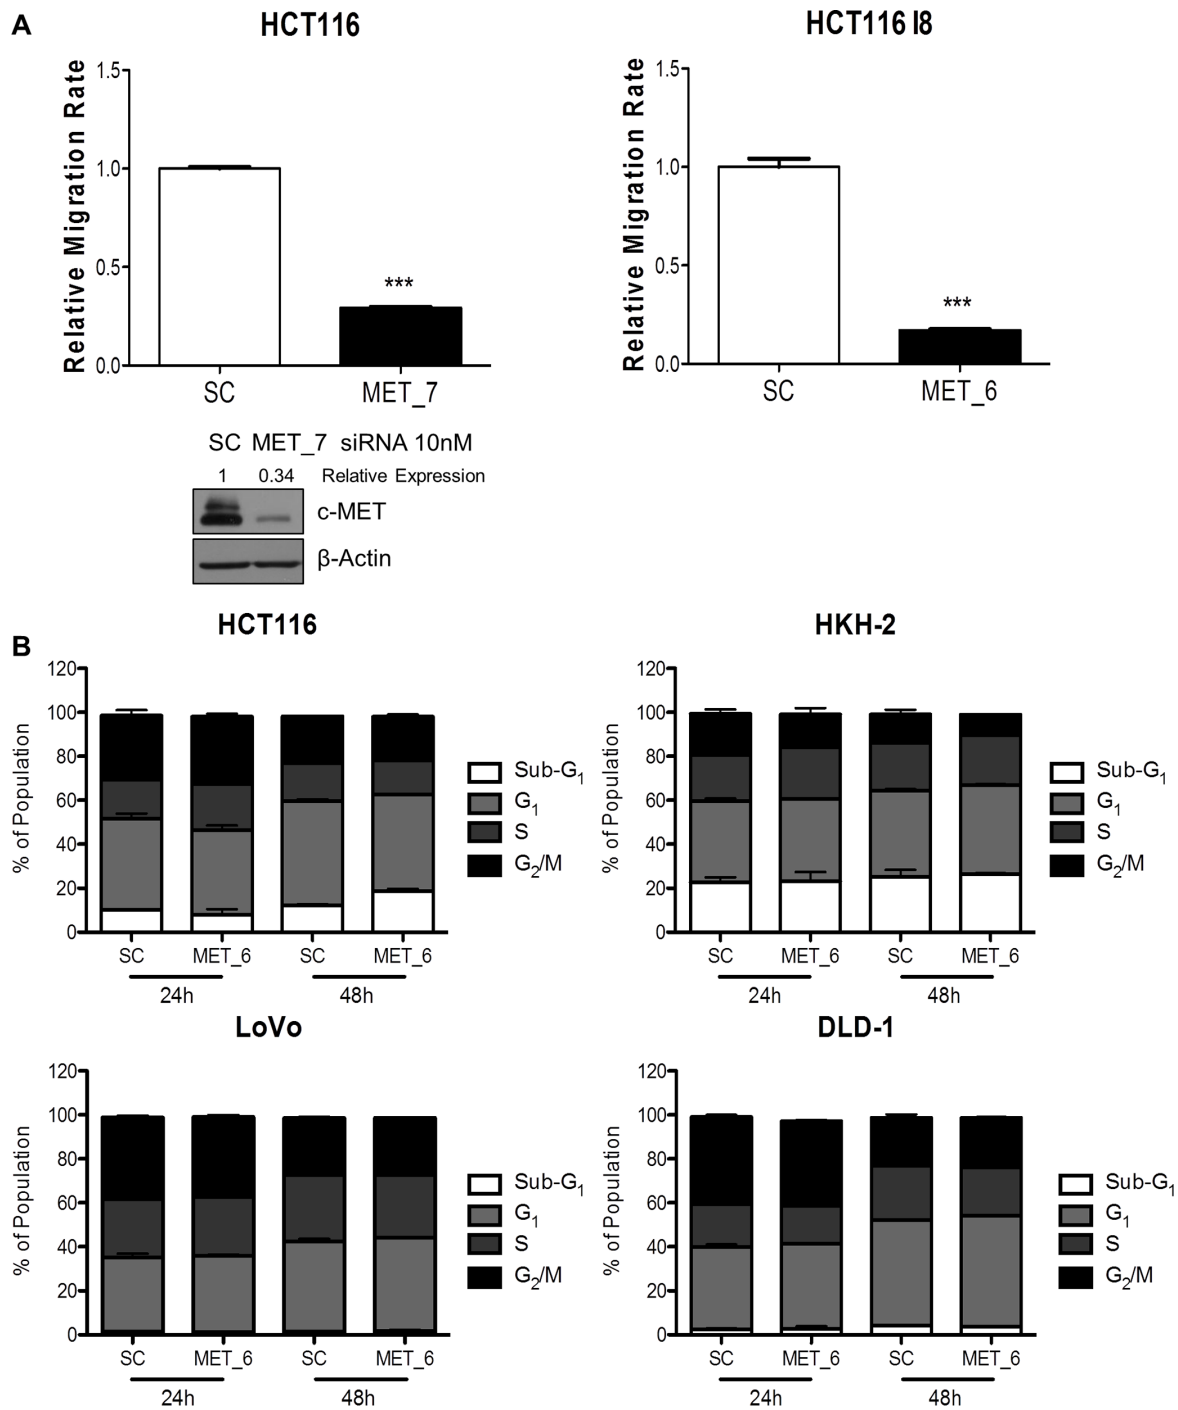

**Supplementary Figure S2: Effect of RNAi against *MET* on migration, apoptosis and cell cycle distribution in parental and invasive CRC cells.** (A) Parental and invasive (18) HCT116 CRC cells were transfected with 10nM SC or 10nM *MET* siRNA (MET\_6 or MET\_7) for 24 hours and migration rates determined using the xCELLigence system and the CIM plate 16 (Roche Applied Sciences). c-MET expression levels were detected by Western blotting. (B) HCT116, HKH-2, LoVo and DLD-1 cells were transfected with scrambled control (SC) or c-MET specific (MET\_6) siRNA for the indicated time and cell cycle profiles were assessed by flow cytometric analysis with PI.

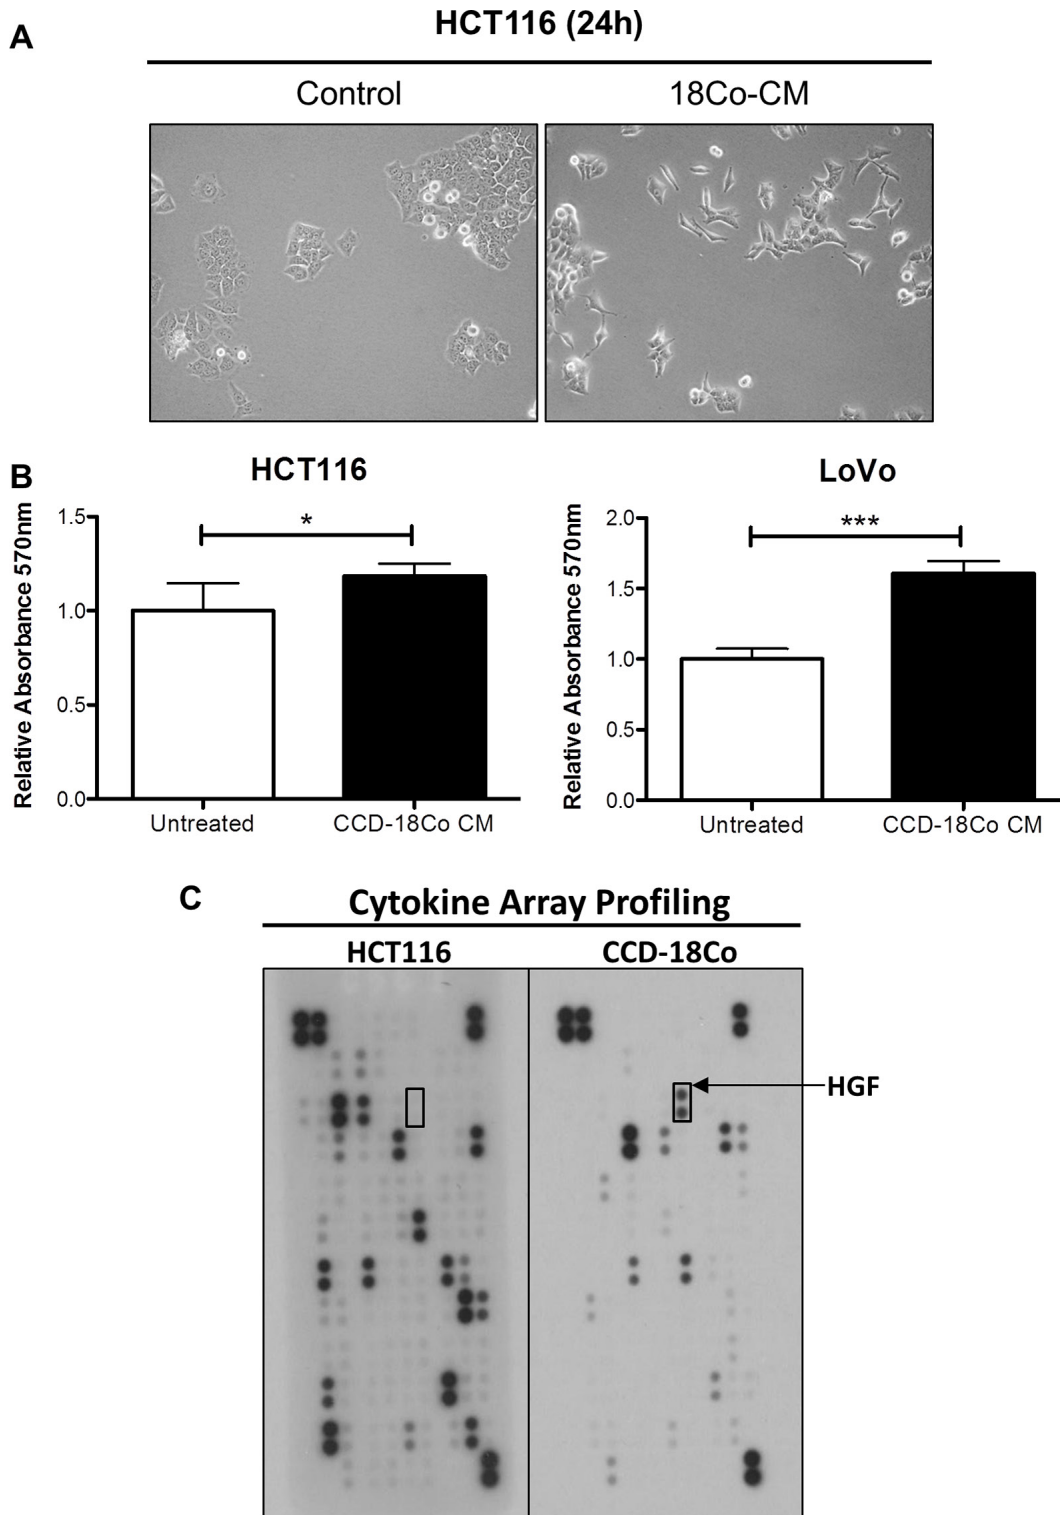

**Supplementary Figure S3: Effect of the CCD-18Co secretome on cell morphology and proliferation of CRC cells. (A)** Images of morphology of HCT116 cells following 24 hours incubation with conditioned medium of CCD-18Co fibroblasts. **(B)** Relative absorbance values of crystal violet stained cells following 72h culture of HCT116 and LoVo cells in conditioned medium of CCD-18Co fibroblasts. **(C)** Cytokine array using conditioned medium from HCT116 cells and CCD-18Co fibroblasts.

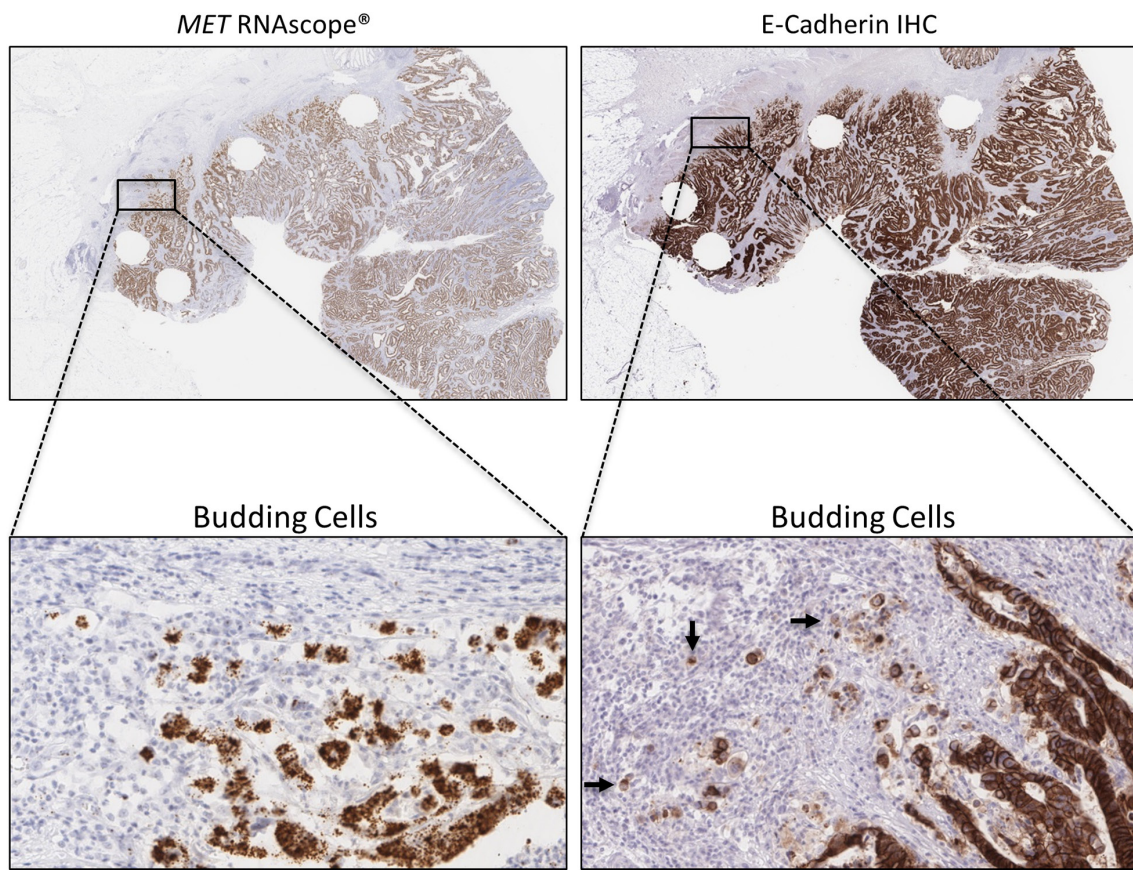

**Supplementary Figure S4: Expression of E-Cadherin by IHC at the CRC invasive front.** Serial sections of CRC tissue indicating simultaneous increases in *MET* transcription and loss of E-Cadherin protein expression in budding cells (arrows) compared to the tumor bulk.

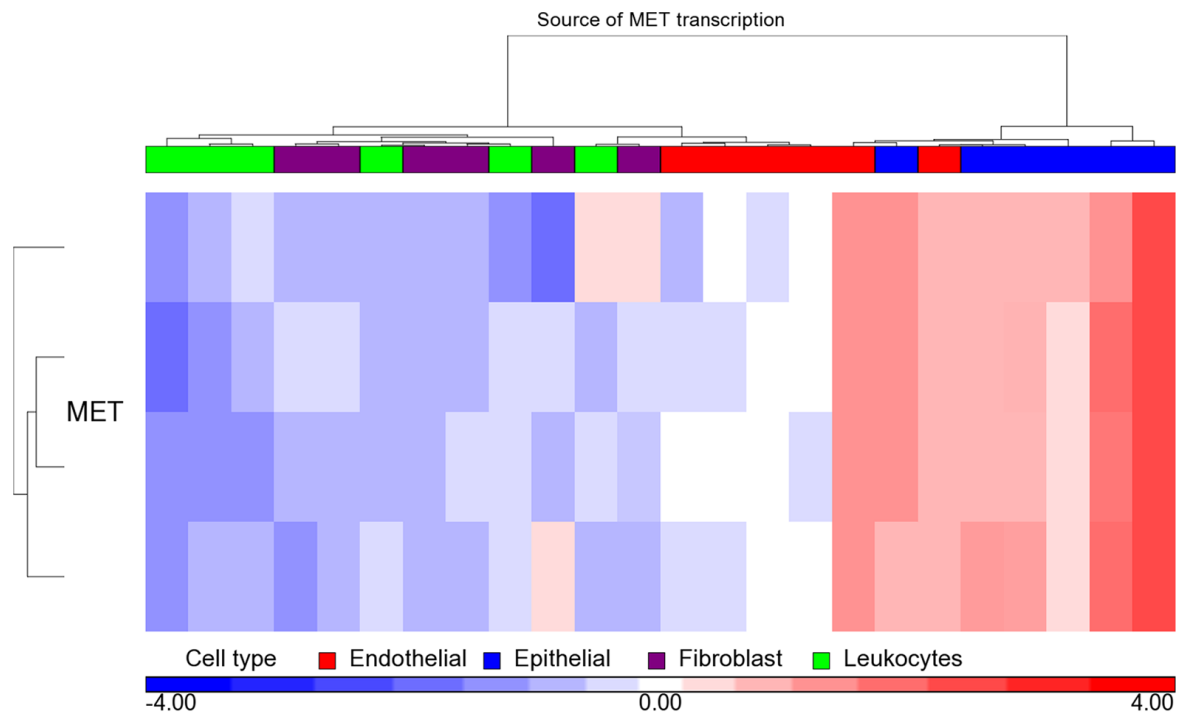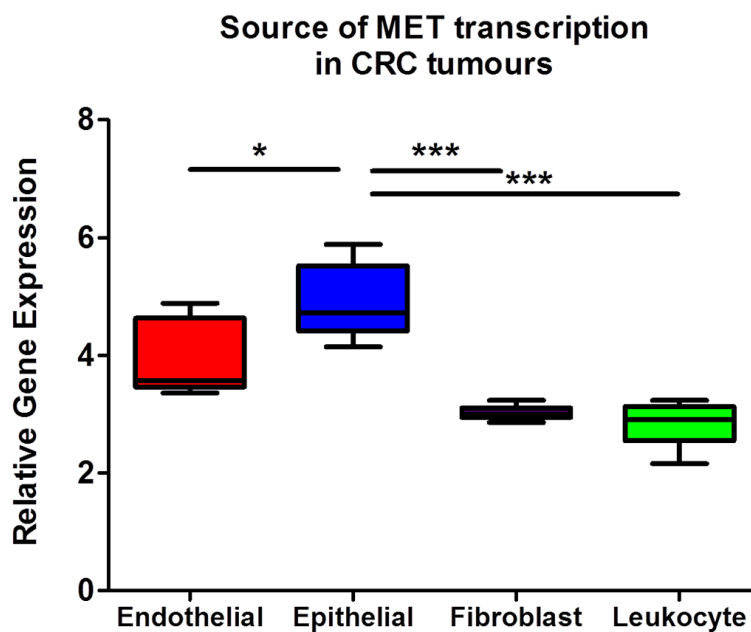

**Supplementary Figure S5: Gene expression levels of *MET* according to cell type in CRC tumours.** Heatmap representation (top) and box and whisker plot (bottom) of *MET* gene expression according to specific endothelial, epithelial, fibroblast or leukocyte cell-of-origin from FACS sorted primary colorectal tumours. Significance values are indicative of a Tukey's post hoc test \* =  $p < 0.05$ , \*\*\* =  $p < 0.001$ .

c-MET IHC Whole Tissue Section Overview

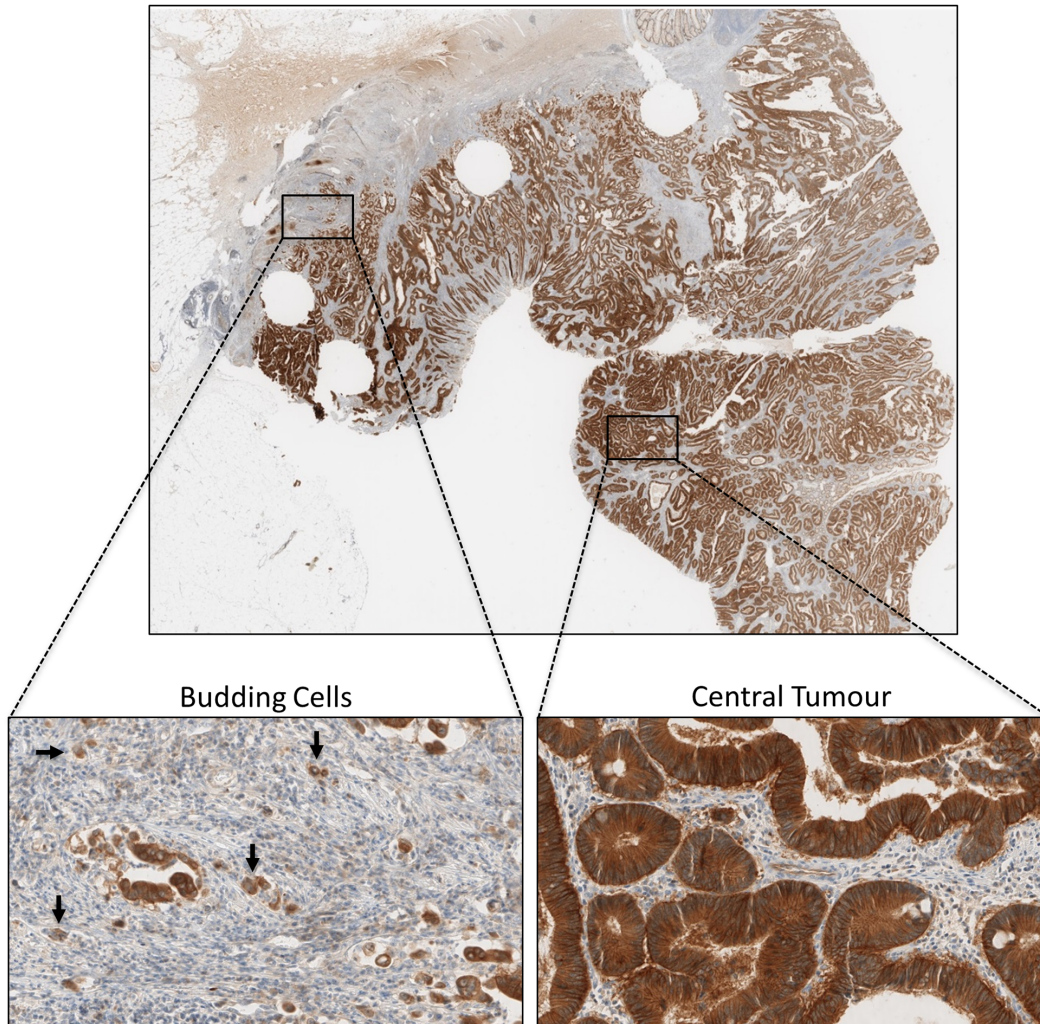

| Path Number | Central Tumour | Budding Cells |
|-------------|----------------|---------------|
| 06 06294    | 3+             | 3+            |
| 07 08026    | 3+             | 3+            |
| 07 09040    | 3+             | 3+            |
| 07 12285    | 2+             | 2+            |
| 07 19378    | 3+             | 3+            |
| 08 04616    | 1+             | 1+            |
| 08 16420    | 2+             | 2+            |
| 08 18598    | 3+             | 3+            |
| 08 23263    | 3+             | 3+            |
| 09 07778    | 3+             | 3+            |
| 09 10174    | 2+             | 2+            |
| 09 11996    | 3+             | 3+            |
| 09 19471    | 3+             | 3+            |

**Supplementary Figure S6: Expression of c-MET protein using IHC at the central tumour and in budding cells at the invasive front.** Semi-quantitative scoring was performed as described in Material and Methods with paired scoring indicated in table and plot.
